# Supplementary material for: Vinorelbine and Intermittent Cyclophosphamide Sensitize an Aggressive Myc-Driven B-Cell Lymphoma to Anti-PD-1 by an Immunological Memory Effective against Tumor Re-Challenge
Source: J Clin Med. 2023 Mar 27;12(7):2535. doi: 10.3390/jcm12072535 (PMC10095342; doi:10.3390/jcm12072535)

## Supplementary Materials

**Table S1.**

Antibodies and gating strategies used in the study. Cell type is indicated in the first column, the phenotype in the second, fluorophores in the third, the clone and the distributors of the antibody in the fourth and fifth respectively.

| Lymphocytes           | Phenotype                      | Fluorophores          | Clones     | Catalogue number | Producer      |
|-----------------------|--------------------------------|-----------------------|------------|------------------|---------------|
| T helper              | CD3+CD4+                       | CD3 BV786             | 145-2C11   | 564379           | BD Bioscience |
|                       |                                | CD4 FITC              | GK1.5      | 553729           | BD Bioscience |
| T cytotoxic           | CD3+CD8+                       | CD3 BV786             | 145-2C11   | 564379           | BD Bioscience |
|                       |                                | CD8 APC-Cy7           | 53-6.7     | 100714           | BioLegend     |
| NK                    | CD335+                         | CD335 Alexa-Fluor 700 | 29A1.4     | 561169           | BD Bioscience |
| B cells               | CD19+                          | CD19 APC              | eBio1D3    | 17-0193-80       | Invitrogen    |
| Active T cytotoxic    | CD3+CD8+CD25+CD69+             | CD3 BV786             | 145-2C11   | 564379           | BD Bioscience |
|                       |                                | CD25 APC eFluor780    | PC61.5     | 47-0251-82       | Invitrogen    |
|                       |                                | CD69 BV605            | H1.2F3     | 563290           | BD Bioscience |
|                       |                                | CD8 APC-Cy7           | 53-6.7     | 100714           | BioLegend     |
| Myeloid cells         | Phenotype                      | Fluorophores          | Clones     | Catalogue number | Producer      |
| Monocytes             | Gr1-CD11b+CD11c+               | Gr1 Pe-Cy7            | RB6-8C5    | 25-5931-81       | Invitrogen    |
|                       |                                | CD11b APC             | M1-70      | 17-0112-82       | Invitrogen    |
|                       |                                | CD11c FITC            | HL3        | 557400           | BD Bioscience |
| Granulocytes          | SSC <sup>high</sup> CD11b+Gr1+ | Gr1 Pe-Cy7            | RB6-8C5    | 25-5931-81       | Invitrogen    |
|                       |                                | CD11b APC             | M1-70      | 17-0112-82       | Invitrogen    |
| MDSC                  | SSC <sup>low</sup> CD11b+Gr1+  | Gr1 Pe-Cy7            | RB6-8C5    | 25-5931-81       | Invitrogen    |
|                       |                                | CD11b APC             | M1-70      | 17-0112-82       | Invitrogen    |
| APC                   | CD11c+CD11b-Gr1-               | Gr1 Pe-Cy7            | RB6-8C5    | 25-5931-81       | Invitrogen    |
|                       |                                | CD11b APC             | M1-70      | 17-0112-82       | Invitrogen    |
|                       |                                | CD11c FITC            | HL3        | 557400           | BD Bioscience |
| APCs PD-L1            | CD11c+CD11b-Gr1-PD-L1+         | Gr1 Pe-Cy7            | RB6-8C5    | 25-5931-81       | Invitrogen    |
|                       |                                | CD11b APC             | M1-70      | 17-0112-82       | Invitrogen    |
|                       |                                | CD11c FITC            | HL3        | 557400           | BD Bioscience |
|                       |                                | PD-L1 PE              | MIH5       | 558091           | BD Bioscience |
| Exhausted T cells     | Phenotype                      | Fluorophores          | Clones     | Catalogue number | Producer      |
| T cytotoxic Exhausted | CD45+CD3+CD8+PD-1+TIM3+        | CD3 BV786             | 145-2C11   | 564379           | BD Bioscience |
|                       |                                | CD4 FITC              | GK1.5      | 553729           | BD Bioscience |
|                       |                                | CD8 APC-Cy7           | 53-6.7     | 100714           | BioLegend     |
|                       |                                | PD-1 PE               | RMP1-0     | 566831           | BD Bioscience |
|                       |                                | TIM3 BV421            | 5D12/TIM-3 | 747626           | BD Bioscience |
|                       |                                | CD45 PerCP            | 30-F11     | 557235           | BD Bioscience |
| T Helper Exhausted    | CD45+CD3+CD4+PD-1+TIM3+        | CD3 BV786             | 145-2C11   | 564379           | BD Bioscience |
|                       |                                | CD4 FITC              | GK1.5      | 553729           | BD Bioscience |
|                       |                                | CD8 APC-Cy7           | 53-6.7     | 100714           | BioLegend     |
|                       |                                | PD-1 PE               | RMP1-0     | 566831           | BD Bioscience |
|                       |                                | TIM3 BV421            | 5D12/TIM-3 | 747626           | BD Bioscience |
|                       |                                | CD45 PerCP            | 30-F11     | 557235           | BD Bioscience |

Supplementary Figure S1

Therapeutic scheme used in this study.

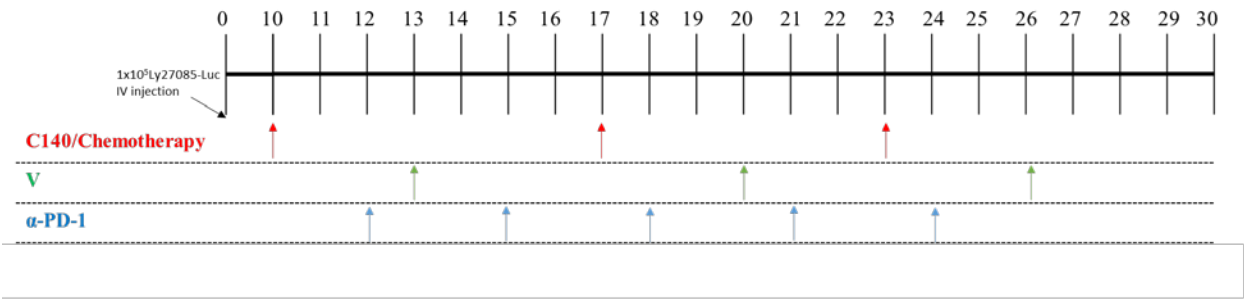

Supplement: Supplementary file 1 [file jcm-12-02535-s001.zip › jcm-2227171-supplementary.pdf]
